# Supplementary material
Source: PubMed Central journal article supplement (PMC1965539)

**DMSO RE LY LY+RE**

**p-ERK1/2**

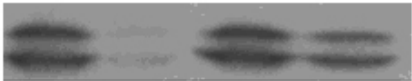

**ERK1/2**

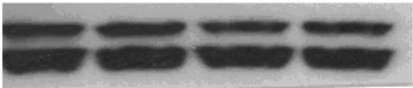

Supplement: pnas_0704360104_1.pdf [file pnas_0704360104_1.pdf]

**siNMMII**    **NTsi**

**NMMII**

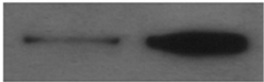

**$\gamma$ -tubulin**

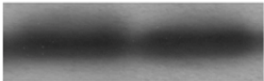

Supplement: pnas_0704360104_2.pdf [file pnas_0704360104_2.pdf]

**NTsi+U0126**

**siNMMII+DMSO**

**Osteo**

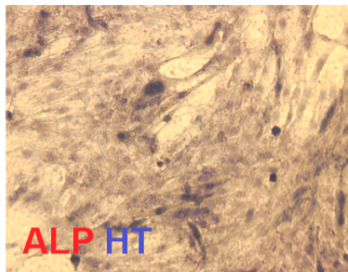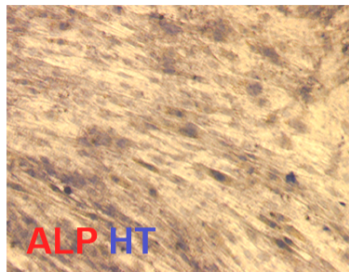

**Adipo**

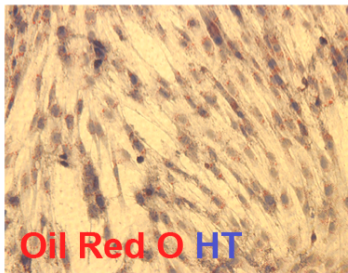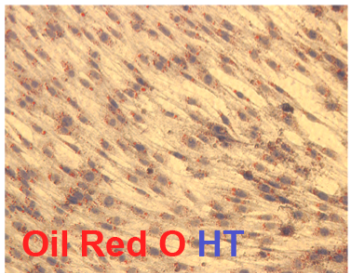

Supplement: pnas_0704360104_3.pdf [file pnas_0704360104_3.pdf]

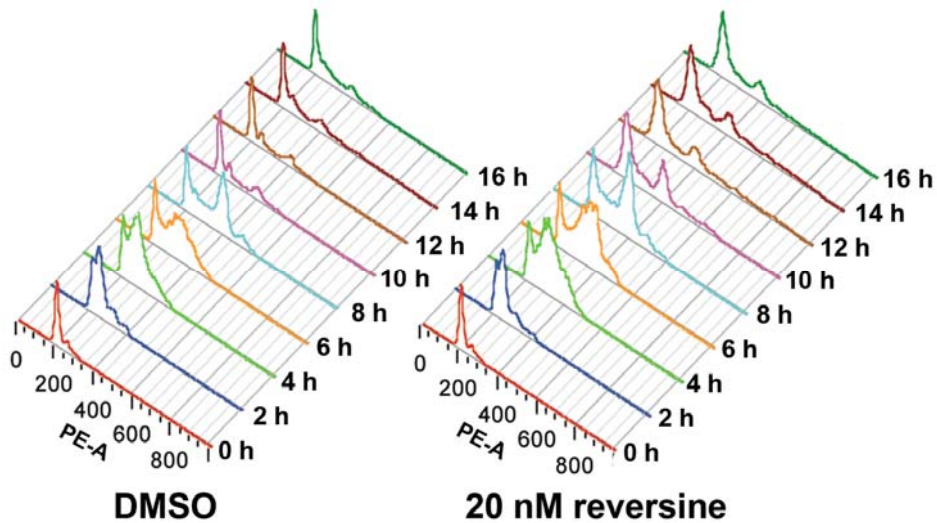

Supplement: pnas_0704360104_4.pdf [file pnas_0704360104_4.pdf]

a.

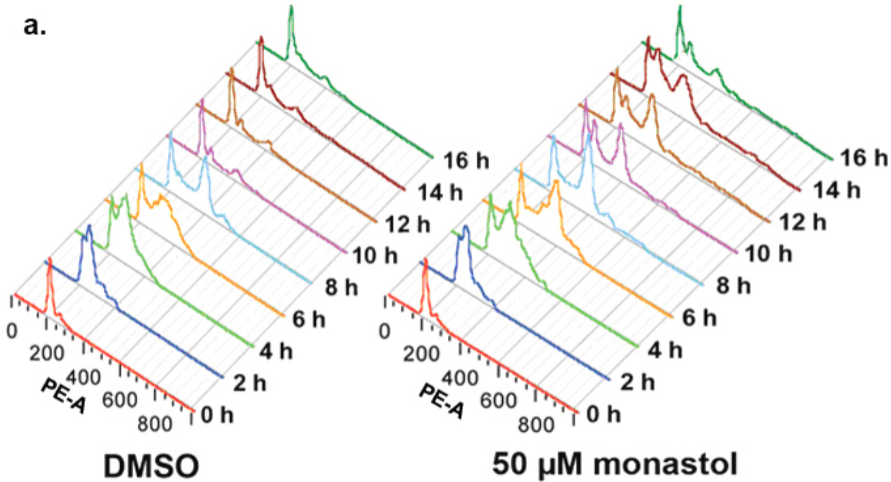

Supplement: pnas_0704360104_5.pdf [file pnas_0704360104_5.pdf]

b.

DMSO

50  $\mu$ M monastrol  
+10  $\mu$ M U0126

Osteo

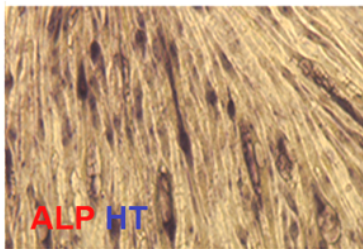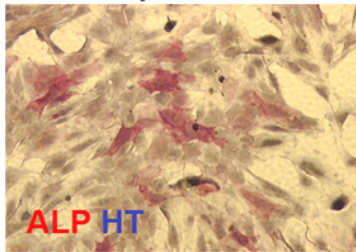

Adipo

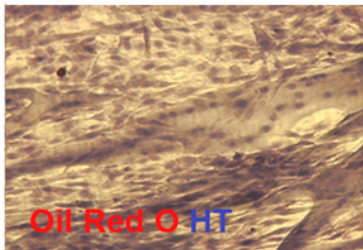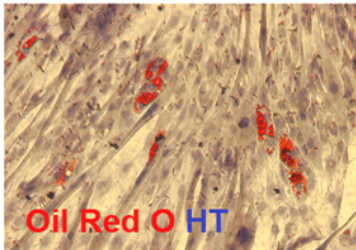

Supplement: pnas_0704360104_6.pdf [file pnas_0704360104_6.pdf]

a. DMSO RE U0126

Ac-H3

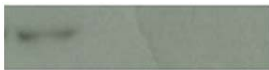

H3

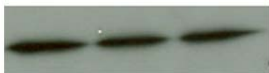

b. TSA+RE

RE

Osteo

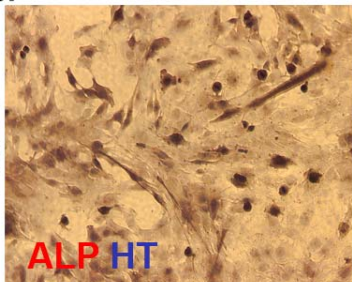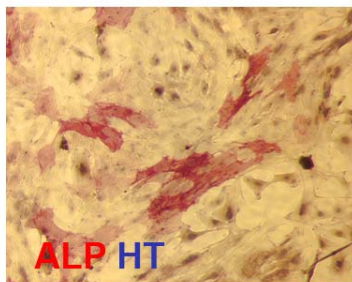

Adipo

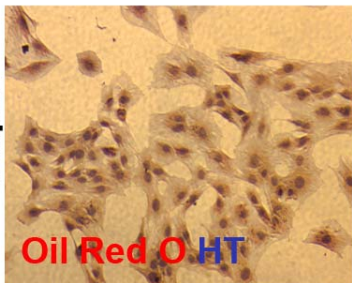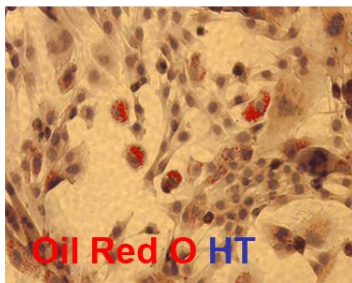

Supplement: pnas_0704360104_7.pdf [file pnas_0704360104_7.pdf]
